# Supplementary material for: Biomarker evidence for the occurrence of anaerobic ammonium oxidation in the eastern Mediterranean Sea during Quaternary and Pliocene sapropel formation
Source: Copernicus journal article supplement (doi:10.5194/bg-16-2467-2019), 2019-06-19
Supplement: Supplementary file 1 [file bg-16-2467-2019-supplement.pdf]

Supplement of Biogeosciences, 16, 2467–2479, 2019  
<https://doi.org/10.5194/bg-16-2467-2019-supplement>  
© Author(s) 2019. This work is distributed under  
the Creative Commons Attribution 4.0 License.

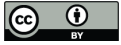

*Supplement of*

## **Biomarker evidence for the occurrence of anaerobic ammonium oxidation in the eastern Mediterranean Sea during Quaternary and Pliocene sapropel formation**

**Darci Rush et al.**

*Correspondence to:* Darci Rush ([darci.rush@nioz.nl](mailto:darci.rush@nioz.nl))

The copyright of individual parts of the supplement might differ from the CC BY 4.0 License.

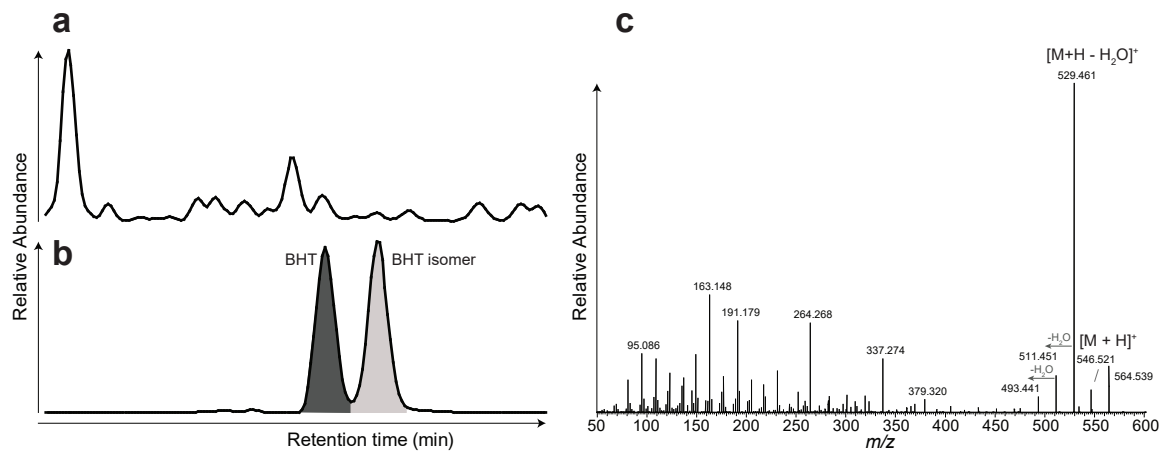

Supplemental Figure 1. High resolution MS analysis of 64PE406-E1 core depth 46 – 47 cm. (a) Base peak chromatogram, (b) combined extracted ion currents (within 3 ppm) of protonated, ammoniated, and sodiated adducts ( $m/z$  547.472 + 564.499 + 569.454, respectively) of non-derivatised BHT and BHT isomer, (c) averaged orbitrap HRMS2 ( $n = 6$ ) of the BHT isomer ammoniated adduct ( $[M+NH_4]^+$ ;  $m/z$  564.499).
